# Supplementary material
Source: PubMed Central journal article supplement (PMC5660865)
Supplement: NIHMS914625-supplement-Supperting_Information_File.pdf [file NIHMS914625-supplement-Supperting_Information_File.pdf]

Supporting Information for

**Versatile Core–Shell Nanoparticle@Metal–Organic Framework Nanohybrids:  
Exploiting Mussel-Inspired Polydopamine for Tailored Structural Integration**

Jiajing Zhou,<sup>†</sup> Peng Wang,<sup>†,‡</sup> Chenxu Wang,<sup>†</sup> Yi Ting Goh,<sup>†</sup> Zheng Fang,<sup>†</sup> Phillip B. Messersmith,<sup>§</sup> and Hongwei Duan<sup>\*,†</sup>

<sup>†</sup>School of Chemical and Biomedical Engineering, Nanyang Technological University, 70 Nanyang Drive, Singapore 637457.

<sup>‡</sup>Nanyang Environment and Water Research Institute (NEWRI), Nanyang Technological University, 1 Cleantech Loop, Singapore 637141.

<sup>§</sup>Bioengineering and Materials Science and Engineering Departments, University of California, Berkeley, California 94720-1760, United States.

Email: hduan@ntu.edu.sg

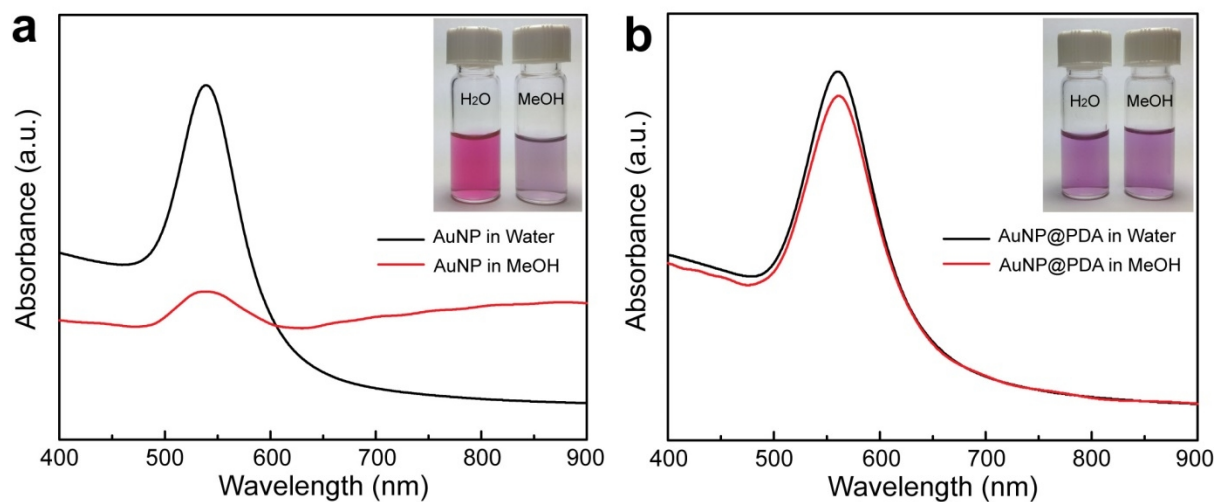

**Figure S1.** UV-vis spectra of (a) AuNP and (b) AuNP@PDA dispersed in water and methanol, respectively. Inset of photographs show color change of solution.

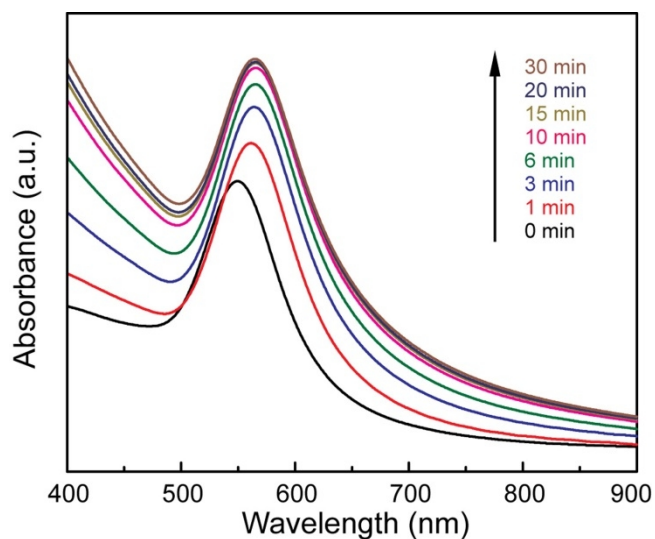

**Figure S2.** UV-vis spectra of the AuNP@PDA@ZIF-8 reaction solution recorded in the initial 30 min.

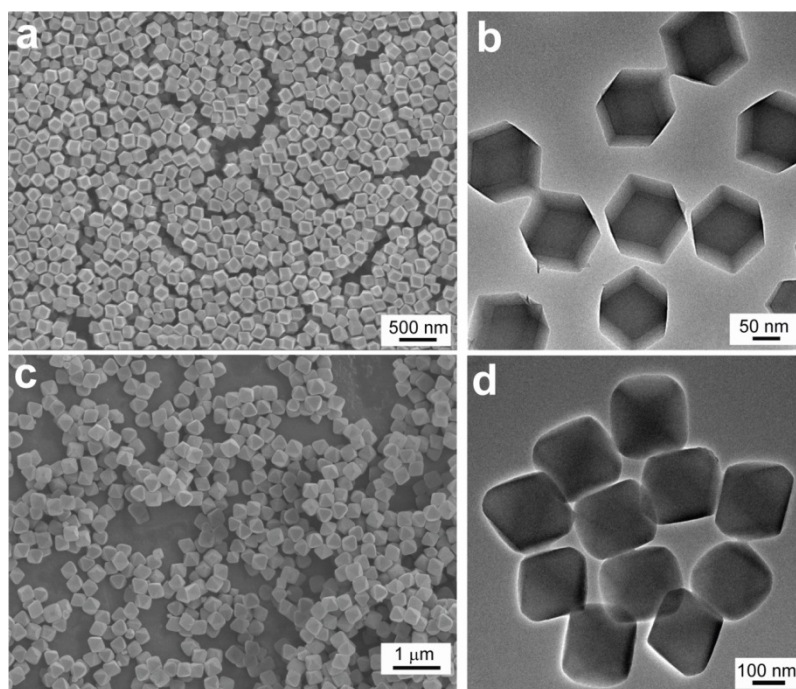

**Figure S3.** SEM and TEM images of a,b) ZIF-8 and c,d) UiO-66 at different magnifications.

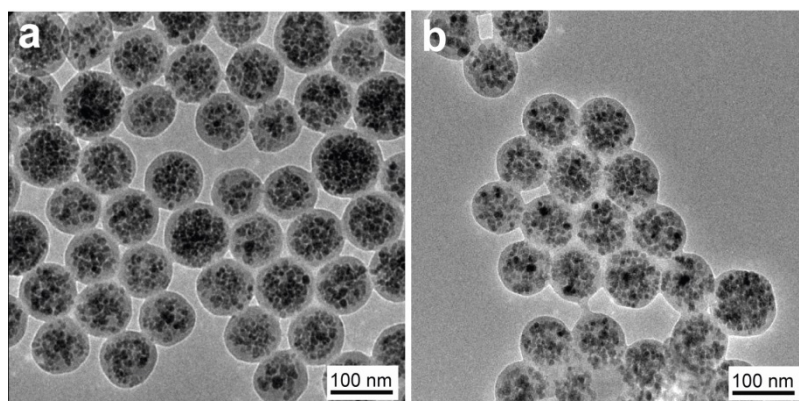

**Figure S4.** TEM images of (a) MagNPs, (b) MagNP after reacting with Au precursor.

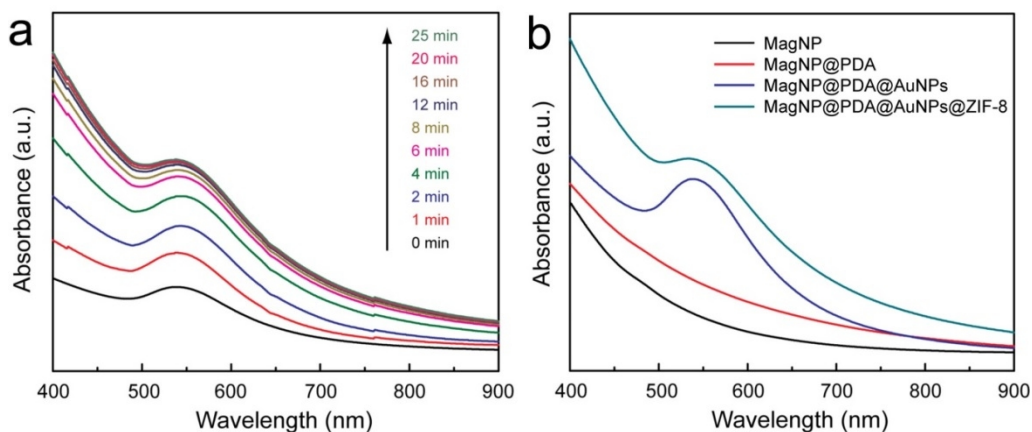

**Figure S5.** (a) UV-vis spectra of the MagNP@PDA@AuNPs@ZIF-8 reaction solution recorded in the initial 25 minutes. (b) UV-vis spectra of the products at different stages.

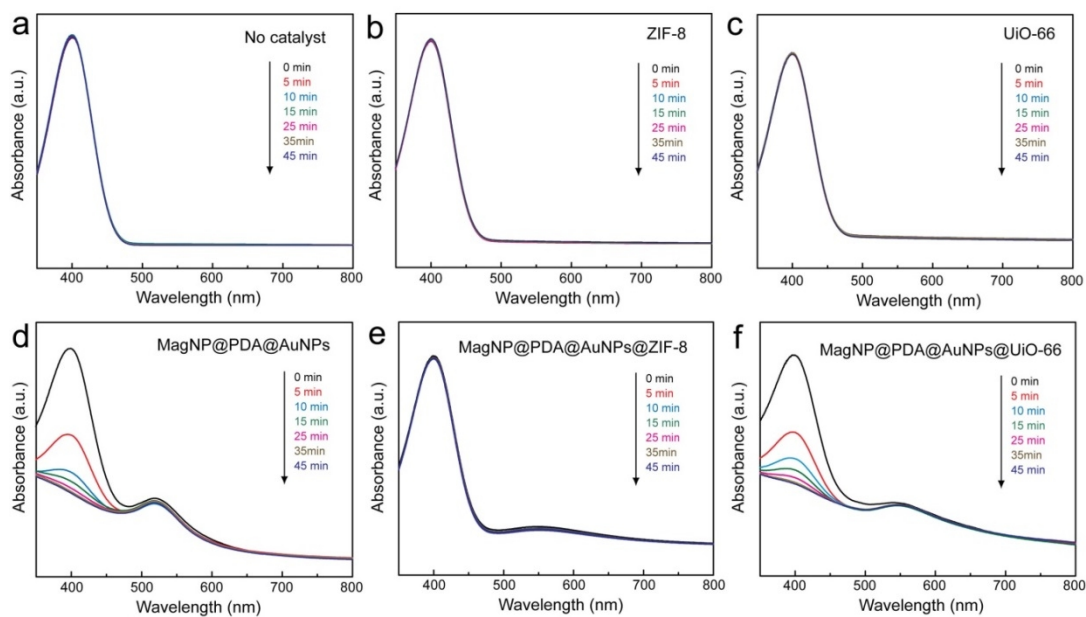

**Figure S6.** UV-vis spectra of the reduction of 4-NP catalyzed by various materials.

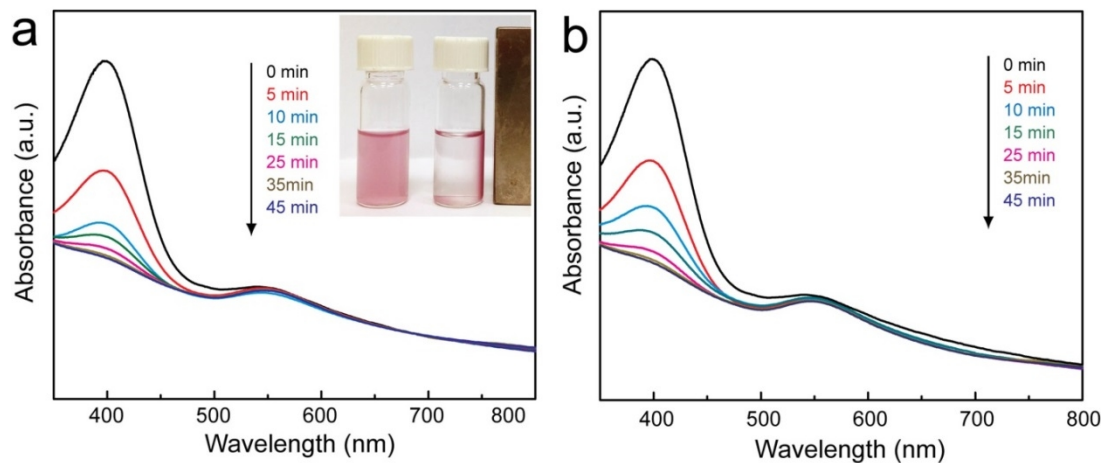

**Figure S7.** UV-vis spectra of the reduction of 4-NP catalyzed by  $\text{MagNP@PDA@AuNPs@UiO-66}$  in two consecutive cycles (a) and (b). Inset of S6a: photograph shows the magnetic separation of  $\text{MagNP@PDA@AuNPs@UiO-66}$ .
